# Supplementary material
Source: Springer Nature journal article supplement (https://www.springermedizin.de/resource/supplementary/12865_2010_364_MOESM2_ESM.pdf/9427840)

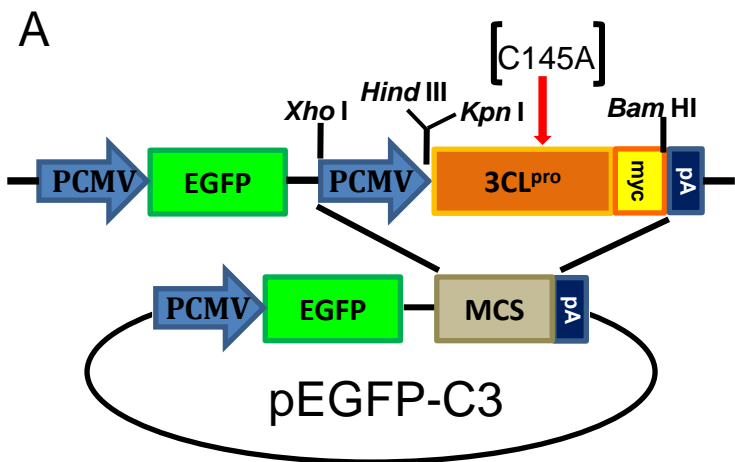

**B**

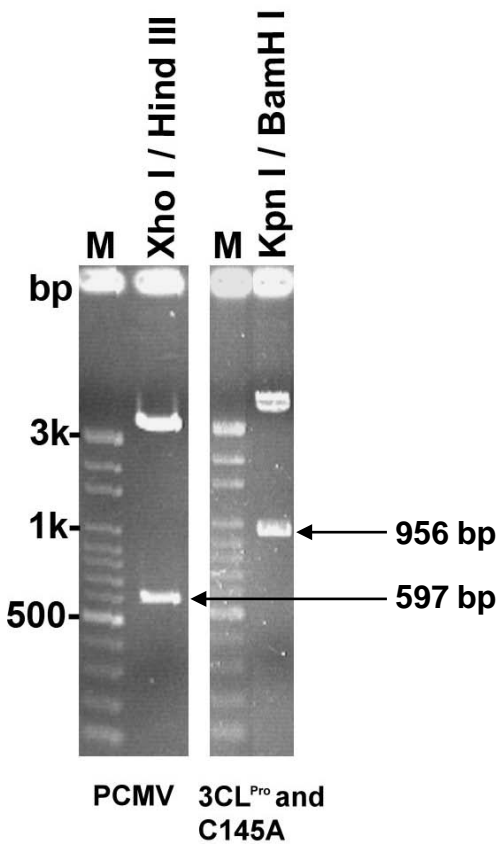

Supplement: MOESM2 [file 9427840]
